# Supplementary material
Source: PubMed Central journal article supplement (PMC3043637)

**Supplementary Figure 1. The Effects of adenine nucleotides and adenosine on mitogenic signaling pathways in VVEC.** (A-C): average data from Western blot analysis ( [n=3-5], 10 min after agonist stimulation; \*p<0.05; \*\* p<0.01); (D): representative Western blot image for phospho-ERK1/2, phospho-Akt and phospho-S6.

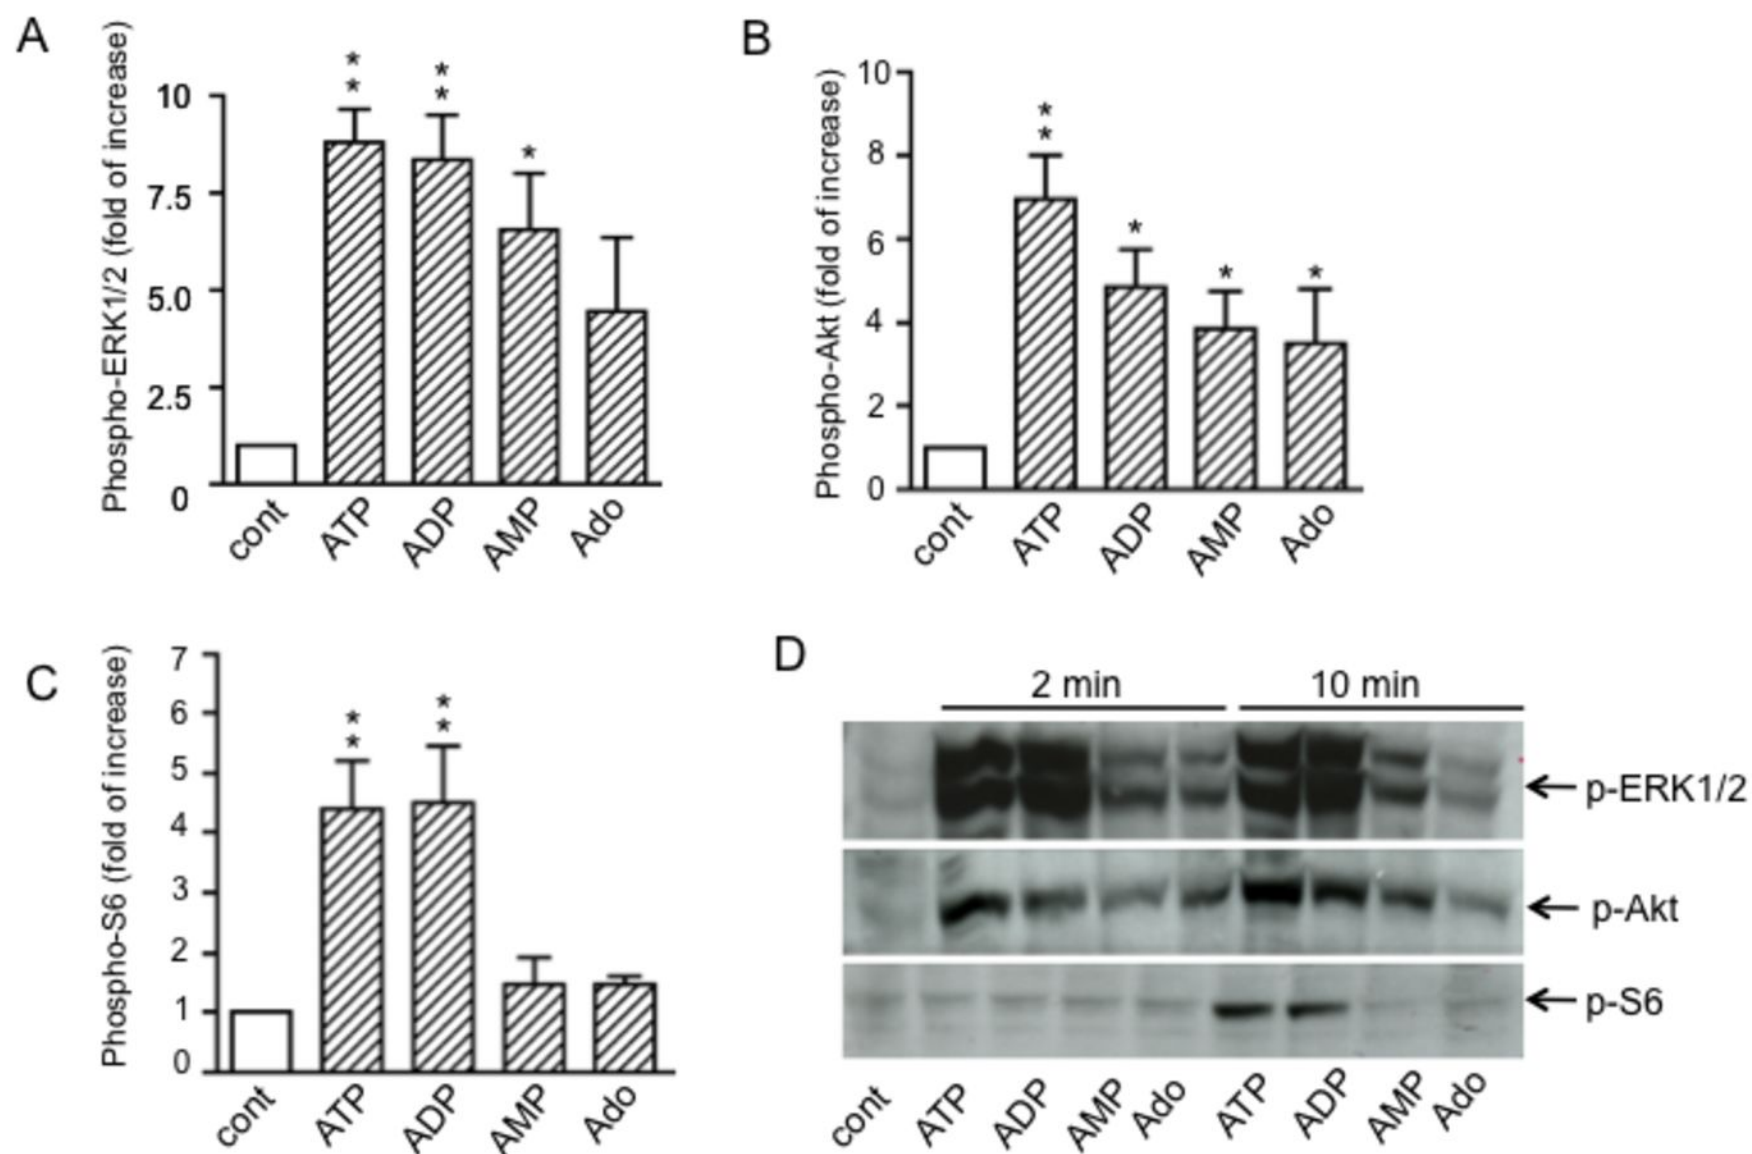

Supplement: figS1.pdf [file figS1.pdf]
