# Supplementary material
Source: PubMed Central journal article supplement (PMC3043637)

**Supplementary Figure 2.** The Effect of PTx treatment on agonist-stimulated activation of ERK1/2, Akt, and S6 in VVEC (n=3-5; \*p<0.05;\*\*p<0.01)

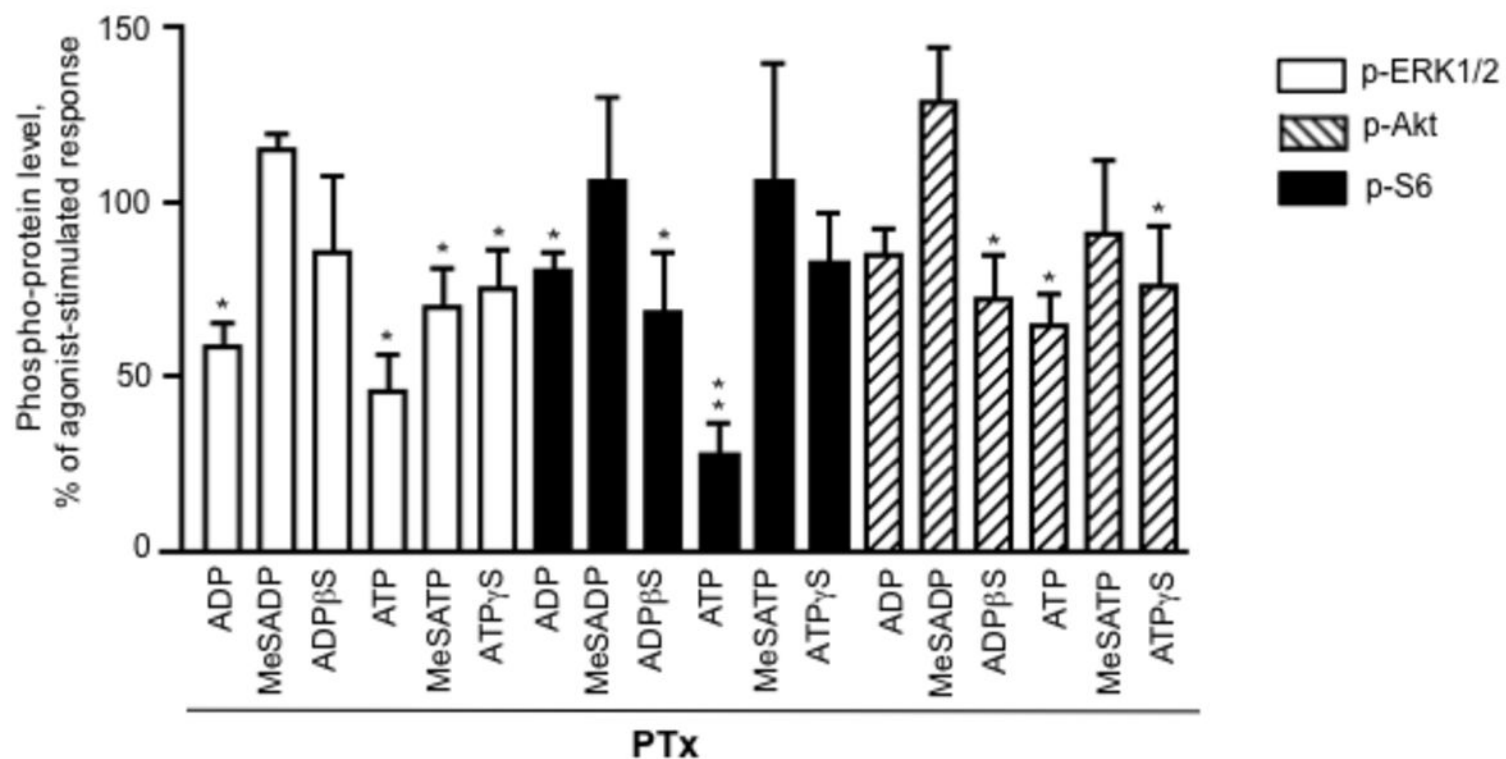

Supplement: figS2.pdf [file figS2.pdf]
